# Supplementary material for: GSK3β Inhibition by Phosphorylation at Ser389 Controls Neuroinflammation
Source: MDPI journal article supplement (doi:10.3390/ijms24010337), 2022-12-25
Supplement: s1 [file s1]

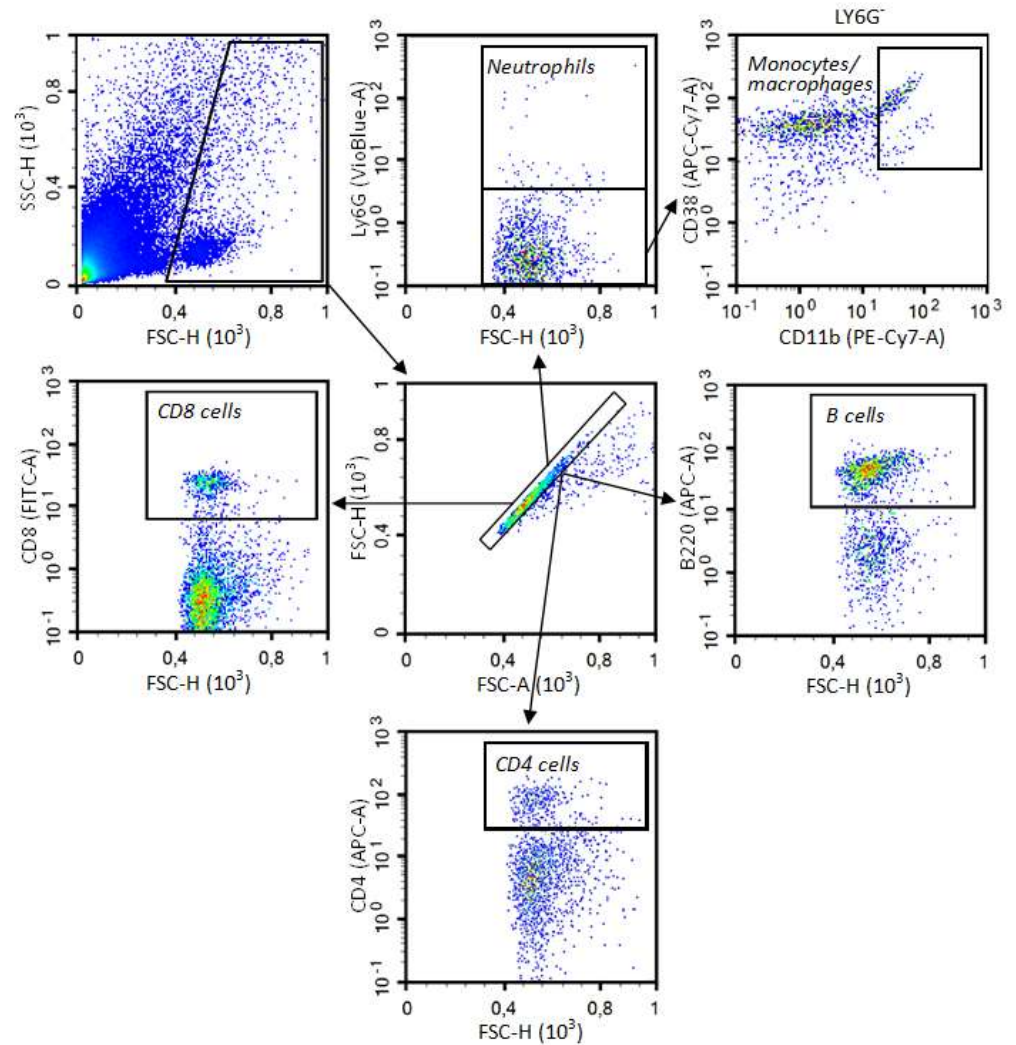

**Figure S2.** Gating strategy for flow cytometry analysis of spleen cells. After mechanical dissociation, spleen cells were processed for flow cytometry. Subpopulations of Ly6G<sup>+</sup> neutrophils, Ly6G<sup>-</sup> CD38<sup>+</sup>CD11b<sup>+</sup> monocytes/macrophages, as well as CD8<sup>+</sup>, CD4<sup>+</sup> and B220<sup>+</sup> cells were gated for analysis. Representative density plots are shown.
